# Supplementary material for: Effect of interlayer spacing on sodium ion insertion in nanostructured titanium hydrogeno phosphates/carbon nanotube composites
Source: Royal Society of Chemistry journal article supplement (doi:10.1039/c6ra08242d), 2016-01-01
Supplement: c6ra08242d1.pdf [file c6ra08242d1.pdf]

Supporting Information

**Effect of Interlayer Spacing on Sodium Ion Insertion in Nanostructured  
Titanium Hydrogeno Phosphates/Carbon Nanotube Composites**

Gyeonghee Lee,<sup>a</sup> Xiao Zhang,<sup>a</sup> Hongbo Zhang,<sup>a</sup> Chakrapani V. Varanasi<sup>\*b</sup> and Jie Liu<sup>\*a</sup>

<sup>a</sup> Department of Chemistry, Duke University, Durham, North Carolina 27708, United States

<sup>b</sup> Army Research Office, Durham, North Carolina 27703, United States

Email: chakrapani.v.varanasi.civ@mail.mil, j.liu@duke.edu

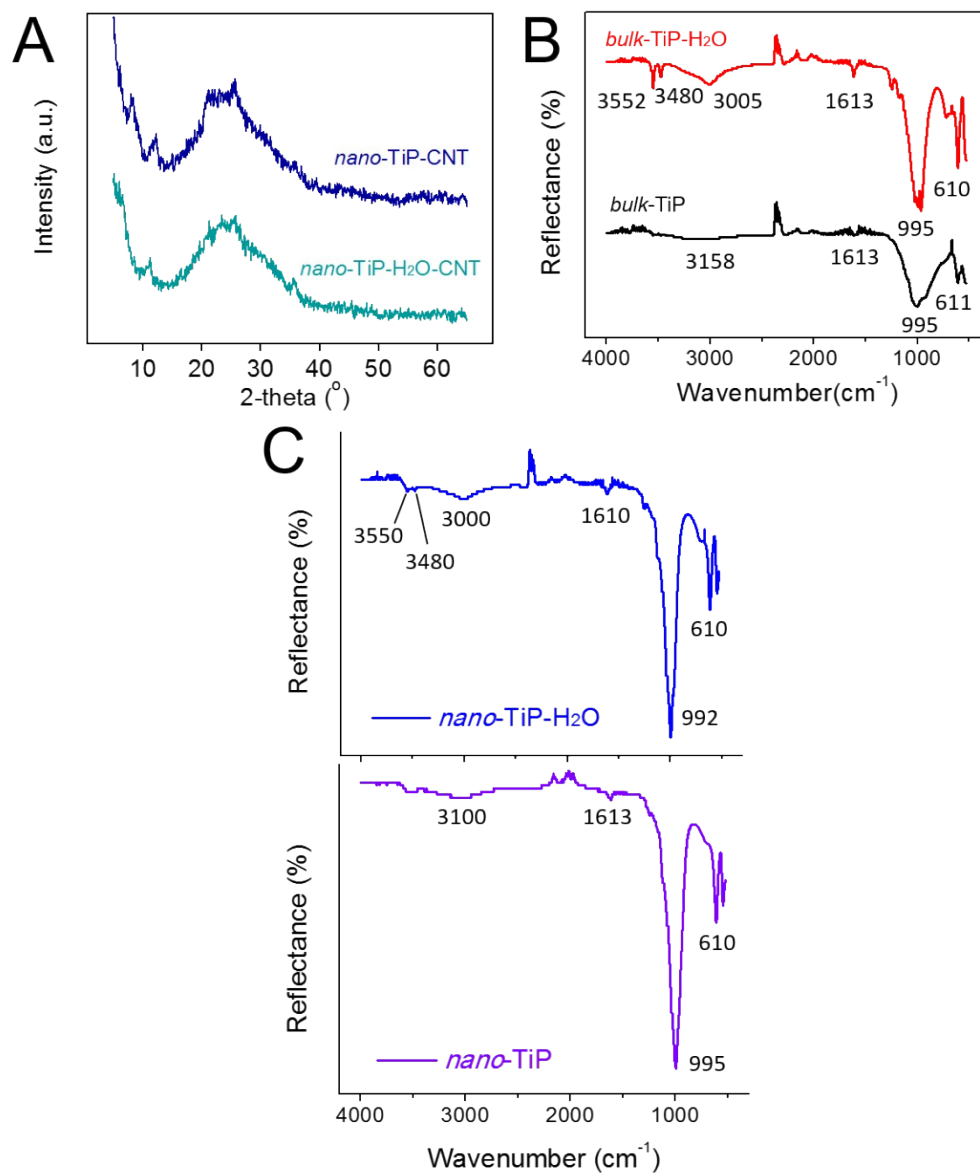

**Figure S1:** (A) XRD patterns of *nano-TiP-H<sub>2</sub>O-CNT* and *nano-TiP-CNT*, (B) FT-IR spectra of *bulk-TiP-H<sub>2</sub>O*, *bulk-TiP*, (C) *nano-TiP-H<sub>2</sub>O*, and *nano-TiP*.

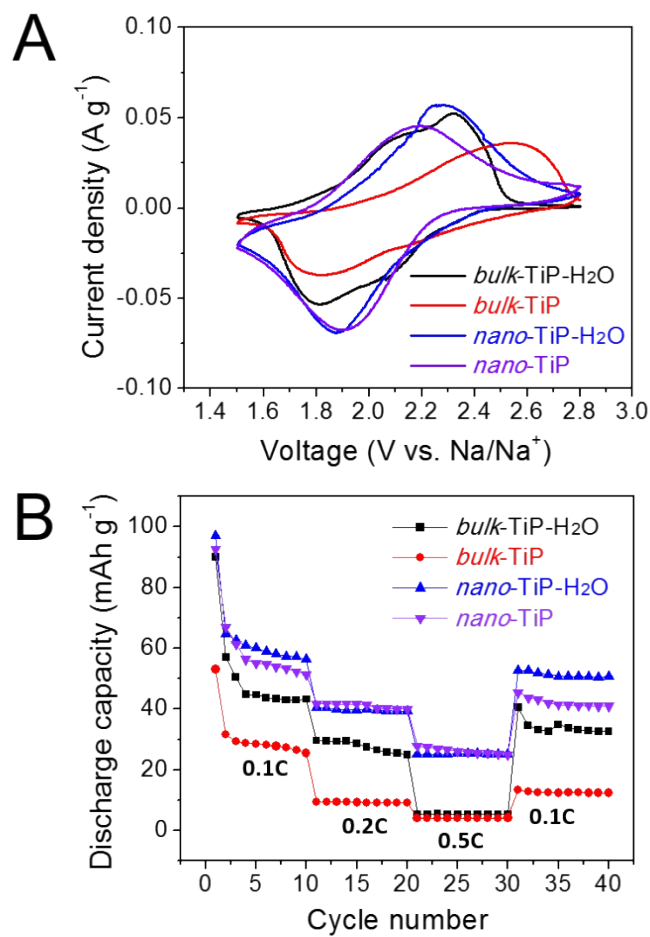

**Figure S2: Comparisons of (A) CV curves measured at  $0.1 \text{ mV s}^{-1}$  and (B) specific capacity of *bulk-TiP-H<sub>2</sub>O*, *bulk-TiP*, *nano-TiP-H<sub>2</sub>O*, and *nano-TiP* at various current rates of 0.1, 0.2, and 0.5 C.**

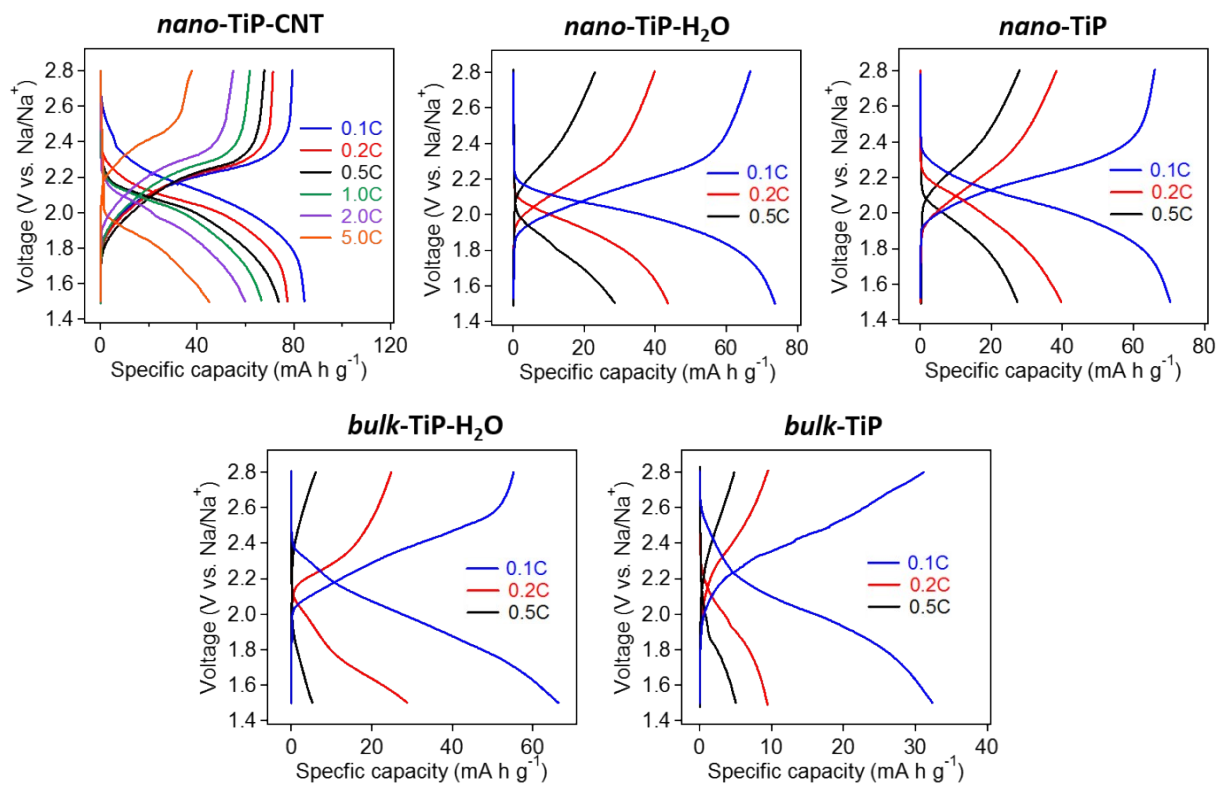

**Figure S3:** Charge-discharge curves of *nano-TiP-CNT*, *nano-TiP-H<sub>2</sub>O*, *nano-TiP*, *bulk-TiP-H<sub>2</sub>O*, and *bulk-TiP* at various current rates of 0.1, 0.2, 0.5, 1.0, 2.0, and 5.0 C.

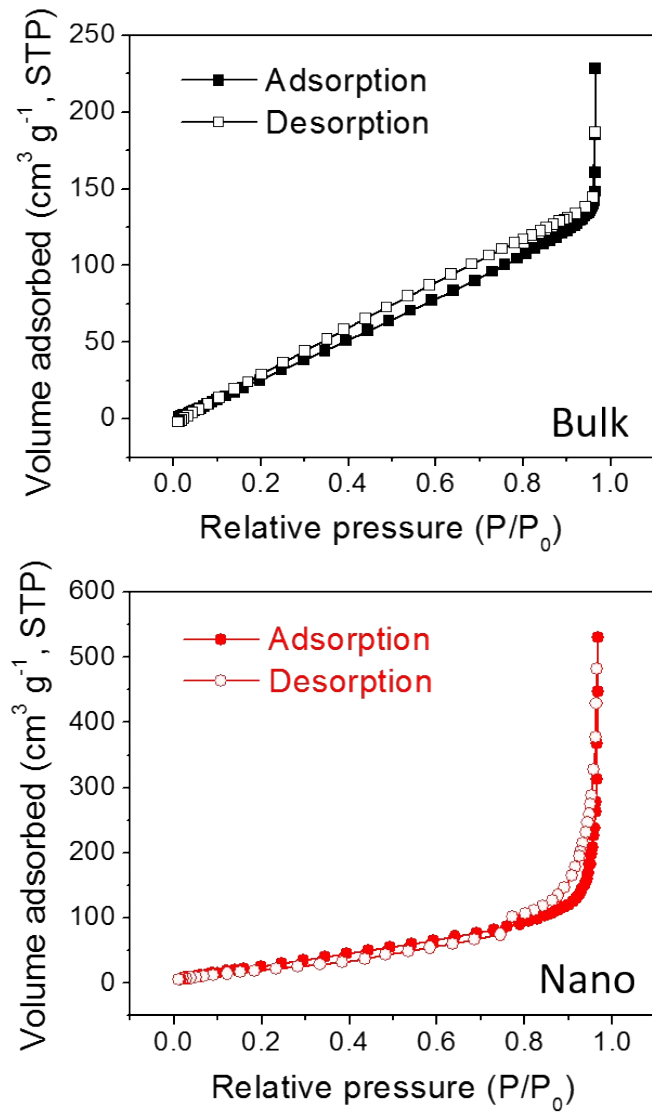

Figure S4: N<sub>2</sub> adsorption and desorption isotherms of *bulk*-TiP-H<sub>2</sub>O and *nano*-TiP-H<sub>2</sub>O.

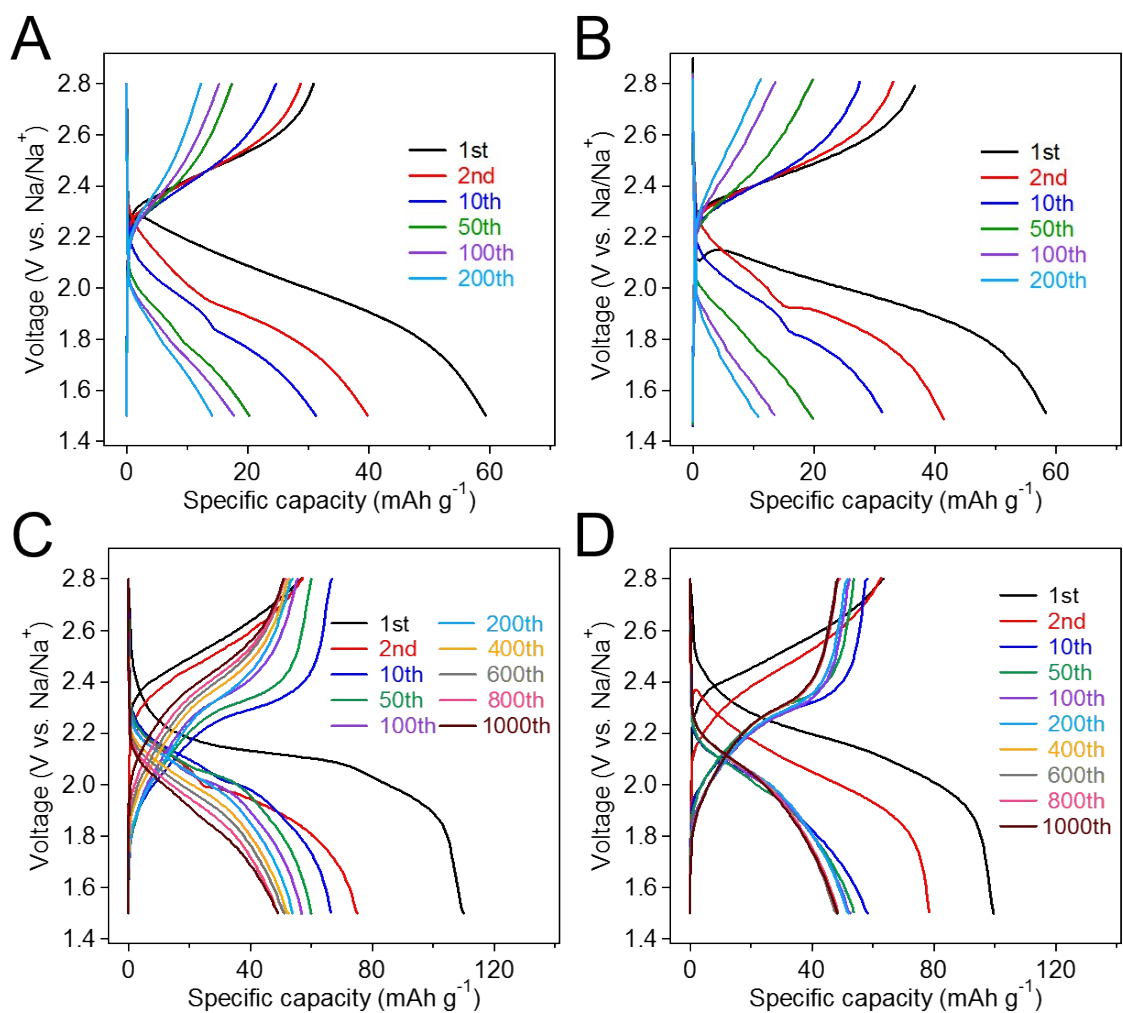

**Figure S5: Charge and discharge capacity changes of *nano*-TiP-H<sub>2</sub>O, *nano*-TiP, *nano*-TiP-H<sub>2</sub>O-CNT, and *nano*-TiP-CNT during long term cycle tests performed at 2.0 C.**

The Na-ion diffusion coefficient was calculated using the following equation:

$$D_{\text{Na}^+} = R^2 T^2 / 2 A^2 n^4 F^4 C^2 \sigma^2$$

where  $D_{\text{Na}^+}$  is the Na-ion diffusion coefficient,  $R$  is gas constant,  $T$  is the temperature,  $n$  represents the number of electrons per molecule during Na-ion insertion,  $F$  is Faraday constant,  $A$  ( $0.64 \text{ cm}^2$ ) is the area of the interface between the electrode and electrolyte,  $C$  is the concentration of Na-ion.<sup>1</sup> The Warburg coefficient,  $\sigma$  can be determined from the relationship between the real part of  $Z$  and square root frequency,  $1/\omega^{1/2}$  ( $\omega = 2\pi f$ ,  $f$  is frequency) in the low frequency region (Figure S6).

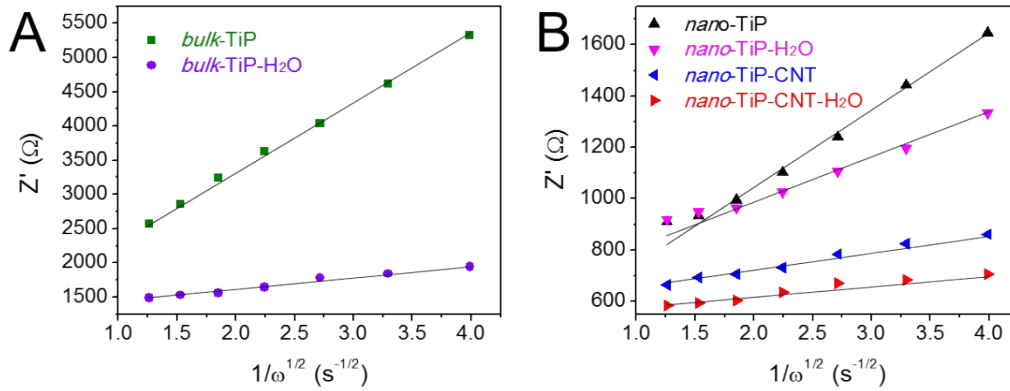

**Figure S6:** The diffusion specific plots for *bulk-TiP*, *bulk-TiP-H<sub>2</sub>O*, *nano-TiP*, *nano-TiP-H<sub>2</sub>O*, *nano-TiP-CNT*, and *nano-TiP-H<sub>2</sub>O-CNT*. The real part is plotted vs.  $1/\omega^{1/2}$ . The slope of the line represents the Warburg coefficient,  $\sigma$ .

## Reference

1. L. Wang, J. Zhao, X. He, J. Gao, J. Li, C. Wan, C. Jiang, *Int. J. Electrochem. Sci.*, 2012, 7, 345 – 353.
